# Supplementary material for: A Cohort Study in Intensive Care Units: Health Decisions Related to Blood Transfusion during the COVID-19 Pandemic
Source: MDPI journal article supplement (doi:10.3390/jcm11154396), 2022-07-28
Supplement: s1 [file s1]

**Table S1. Participating Hospitals**

| <b>Hospital</b>                                                                             | <b>Region (CCAA)</b> |
|---------------------------------------------------------------------------------------------|----------------------|
| Nacho Ortiz. Hospital Infanta Elena (Huelva)                                                | Andalucía            |
| M <sup>a</sup> Antonia Lollano Zárata. Hospital Virgen de la Victoria de Málaga             | Andalucía            |
| Jesús Emilio Barrueco. Hospital General Universitario de Málaga                             | Andalucía            |
| Marta Recio. Complejo Hospitalario de Jaen                                                  | Andalucía            |
| Nora Palomo. Hospital Universitario Virgen del Rocío (Sevilla)                              | Andalucía            |
| Antonio Gordillo. Hospital Puerta del Mar de Cadiz                                          | Andalucía            |
| Lorena Olivencia. Hospital Universitario Virgen de las Nieves (Granada)                     | Andalucía            |
| Carmen de la Fuente Martos. Hospital Universitario Reina Sofía de Córdoba                   | Andalucía            |
| Jose Garnacho/Gracia Gómez. Hospital Universitario Virgen Macarena                          | Andalucía            |
| Isabel Sancho/Cristina Royo Vila. Hospital Miguel Servet                                    | Aragón               |
| Carlos Serón Arbeloa. Hospital San Jorge de Huesca                                          | Aragón               |
| Paula Ocabo. Hospital Clinico Universitario                                                 | Aragón               |
| Gabriel Tirado. Hospital Royo Villanova                                                     | Aragón               |
| Vitoria Rull. Mútua Maz                                                                     | Aragón               |
| Jose M <sup>a</sup> Montón. Hospital Obispo Polanco (Teruel)                                | Aragón               |
| Débora Fernández Ruiz. Hospital Universitario de Cabueñes                                   | Asturias             |
| Eva Ocampos Martinez. Hospital Valle del Nalón                                              | Asturias             |
| Ana Balán Mariñon. Hospital San Agustín de Aviles                                           | Asturias             |
| Jose Antonio Gonzalo/ Blanca Leoz Gordillo. Hospital Universitario Central de Asturias      | Asturias             |
| Patricia López Fajardo. Hospital Universitario Nuestra Señora de La Candelaria (Las Palmas) | Canarias             |
| Silvia Puerto Corrales. Hospital Doctor José Molina Orosa (Lanzarote)                       | Canarias             |
| Sergio Ruiz Santana. Hospital Universitario Dr Negrín (Las Palmas)                          | Canarias             |
| Luis Ramos. H. General de La Palma.                                                         | Canarias             |
| José Blanco López. Hospital Insular de Las Palmas                                           | Canarias             |
| Maria Luisa Mora. Hospital Universitario de Canarias                                        | Canarias             |
| Leandro Fajardo. Hospital General de Fuerteventura                                          | Canarias             |
| Ángeles Ballesteros. Hospital Universitario Marqués de Valdecilla                           | Cantabria            |
| Alberto Silva. Hospital Universitario de Guadalajara                                        | Castilla La Mancha   |
| Miguel Angel Taberna. Hospital Ntra. Sra. del Prado de Talavera                             | Castilla La Mancha   |
| M <sup>a</sup> Luisa Gómez. Complejo Hospitalario de Ciudad Real                            | Castilla La Mancha   |
| Luis Marina. Hospital Virgen de la Salud de Toledo                                          | Castilla La Mancha   |
| Isabel Murcia. Complejo Hospitalario de Albacete                                            | Castilla La Mancha   |
| Juan Carlos Pérez Llorens. Hospital Virgen de la Luz de Cuenca                              | Castilla La Mancha   |
| Aaron Blandino. Hospital Santa Bárbara de Puertollano (Ciudad Real)                         | Castilla La Mancha   |
| Ana María Domínguez Berrot. Complejo Asistencial Universitario de León                      | Castilla y León      |
| Javier González/Luis Alfonso Marcos Prieto/ Felix Martín González                           | Castilla y León      |
| Complejo Asistencia Universitario de Salamanca                                              | Castilla y León      |
| Leonor Nogales Martín. Hospital Clínico Universitario de Valladolid                         | Castilla y León      |
| Rubén Herrán Monge. Hospital Universitario Río Hortega (Valladolid)                         | Castilla y León      |
| Lorenzo Fernández. Hospital Nuestra Señora de Sonsoles (Ávila)                              | Castilla y León      |

|                                                                                                |                      |
|------------------------------------------------------------------------------------------------|----------------------|
| María Gero Escapa/Paula de la Torre Vélez. Hospital Universitario de Burgos                    | Castilla y León      |
| Diana Donaire. Complejo Hospitalario de Zamora                                                 | Castilla y León      |
| Pablo Romero García. Complejo Asistencial de Soria. Hospital Santa Bárbara                     | Castilla y León      |
| Teresita Alvarez/M <sup>a</sup> Chanel Martínez Jiménez. Hospital El Bierzo de Ponferrada      | Castilla y León      |
| Xavier Soler. Clinica Teknon (Barcelona)                                                       | Cataluña             |
| Luis Servia. Arnau de Vilanova (Lleida)                                                        | Cataluña             |
| Belen Encina. Hospital Quiron (Barcelona)                                                      | Cataluña             |
| Ana Parra. Hospital Sant Joan (Reus)                                                           | Cataluña             |
| Baltasar Sánchez. Mutua de Terrassa                                                            | Cataluña             |
| M <sup>a</sup> Carmen Gilavert. Hospital Joan XXIII (Tarragona)                                | Cataluña             |
| Rosa Catalan. Hospital de Vic                                                                  | Cataluña             |
| Ricard Ferrer. Centro Médico Delfos                                                            | Cataluña             |
| Carol Lorencio. Hospital Josep Trueta (Girona)                                                 | Cataluña             |
| Estela Vals. Hospital Universitario Arnau Vilanova de Lleida                                   | Cataluña             |
| Juan Carlos Ruiz. Hospital Vall d'Hebron                                                       | Cataluña             |
| África Lores/Virginia Alonso. Hospital de Bellvitge                                            | Cataluña             |
| Ana Ochagavía. Hospital Parc Taulí                                                             | Cataluña             |
| Juan Carlos Yébenes. Hospital de Mataró                                                        | Cataluña             |
| José Luís Jiménez. Hospital de Granollers                                                      | Cataluña             |
| Pilar Marcos. Hospital Germans Trias i Pujol (Badalona)                                        | Cataluña             |
| Jose David Simón /Maria Ángeles Relucio Martínez. Hospital Vega Baja de Orihuela               | Comunidad Valenciana |
| Adoración Alcalá López/Diana Martínez López. Hospital General Universitario de Elche           | Comunidad Valenciana |
| Francisco Ángel Jaime Sánchez. Hospital General Universitario Alicante                         | Comunidad Valenciana |
| Lorena Peiró Ferrando/Tatiana Villada Warrington. Hospital Universitario Sant Joan de Alicante | Comunidad Valenciana |
| Amparo Oliva. Hospital Comarcal de Vinaroz                                                     | Comunidad Valenciana |
| Fernando Sánchez Morán. Hospital Universitario La Plana de Villarreal                          | Comunidad Valenciana |
| Ainhoa Serrano Lázaro/Cristina Sanchis Piqueras. Hospital Clínico Universitario Valencia       | Comunidad Valenciana |
| Maria Paz Fuset Cabanes/Karla Vacacela Córdova. Hospital Universitario La Fe Valencia          | Comunidad Valenciana |
| Santiago Borrás Pallé/Luis García Ochando. Hospital Universitario Dr Peset Valencia            | Comunidad Valenciana |
| Maria Desamparados Navarro Eduardo. Hospital Arnau de Vilanova Valencia                        | Comunidad Valenciana |
| Martín Parejo Montell/José Alberto López Baeza. Hospital de La Ribera Alzira                   | Comunidad Valenciana |
| Maria Luisa Micó Gómez/Sonia Gomar Vidal. Hospital de Manises                                  | Comunidad Valenciana |
| Gemma Isabel Furió Mateo. Hospital General de Requena                                          | Comunidad Valenciana |
| Maria Dolores García López/Nélida Cháfer Plasencia. Hospital Lluís Alcanyis de Xàtiva          | Comunidad Valenciana |
| Manuel Palomo Navarro/Miguel Ángel García. Hospital de Sagunto                                 | Comunidad Valenciana |

|                                                                                           |                      |
|-------------------------------------------------------------------------------------------|----------------------|
| Manuel Solera Suárez/Susana Isabel Gil García. Hospital Comarcal Francesc de Borja Gandía | Comunidad Valenciana |
| Elena Bisbal Andrés/Bárbara Vidal Tegedor. Hospital General Universitario Castellón       | Comunidad Valenciana |
| Iker García Saenz. Hospital Donostia                                                      | Euskadi              |
| Goiatz Balciscueta. Hospital Universitario de Araba                                       | Euskadi              |
| M <sup>a</sup> José García Ramos. Hospital Universitario de Cáceres                       | Extremadura          |
| Manuel Cidoncha. Hospital Don Benito Villanueva                                           | Extremadura          |
| Baldomero Jimenez. Hospital Universitario Infanta Cristina de Badajoz                     | Extremadura          |
| Ana Isabel Tizón Varela. Complejo Hospitalario Universitario de Ourense                   | Galicia              |
| Alejandra Pedreira. Complejo Hospitalario Universitario de Santiago                       | Galicia              |
| Melinda Minia. Hospital Álvaro Cunqueiro de Vigo                                          | Galicia              |
| Maite Bouza. Hospital Universitario Lucus Augusti (Lugo)                                  | Galicia              |
| María Lourdes Cordero Lorenzana/Jorge Gamez Zapata/ Teresa Tabuyo Bello                   | Galicia              |
| Complejo Hospitalario Universitario A Coruña                                              |                      |
| Rocío Amézaga Menéndez. Hospital Universitari Son Espases                                 | Illes Balears        |
| Eduardo Antón Caraballo. Hospital de Manacor (Manacor)                                    | Illes Balears        |
| Gemma Rialp Cervera/María Romero Carratalá. Hospital Universitari Son Llàtzer (Palma)     | Illes Balears        |
| Susana Sánchez Pérez. Hospital Mateu Orfila (Menorca)                                     | Illes Balears        |
| Miguel Martín-Calpena Miranda. Hospital Comarcal d'Inca (Inca)                            | Illes Balears        |
| Paz Merino de Cos. Hospital Can Misses (Ibiza)                                            | Illes Balears        |
| Concepción Pavía. Hospital San Pedro de Logroño                                           | La Rioja             |
| Aaron Blandino. Hospital Universitario Ramón y Cajal                                      | Madrid               |
| Ana Isabel González/Sofía Roviroso Bigot. Hospital Fundación de Alcorcón                  | Madrid               |
| Daniel Ballesteros. Hospital Universitario Puerta de Hierro                               | Madrid               |
| Carlos Velayos. Hospital Universitario de Fuenlabrada                                     | Madrid               |
| Victoria Enciso/Sofía García. Hospital Universitario del Henares                          | Madrid               |
| Milagros Sancho. Hospital Universitario Gregorio Marañón                                  | Madrid               |
| Miguel Sánchez. Hospital Universitario Clínico San Carlos                                 | Madrid               |
| Alfonso Canabal. Hospital Universitario de La Princesa                                    | Madrid               |
| Jose Angel Lorente/Mercedes Rubio. Hospital Universitario de Getafe                       | Madrid               |
| Judit Gutierrez. Hospital Universitario 12 de Octubre                                     | Madrid               |
| Maria Teresa Nieto. Hospital Universitario Infanta Elena                                  | Madrid               |
| Nieves Franco. Hospital Universitario de Mostoles                                         | Madrid               |
| Emilio Nevado. Hospital Universitario del Sureste (Parla)                                 | Madrid               |
| Eva Manteiga/Inma Colino. Hospital Infanta Cristina (Parla)                               | Madrid               |
| M <sup>a</sup> Ángeles Alonso. Hospital Universitario del Tajo                            | Madrid               |
| Kapil Nanwani/Andrés Saravia. Hospital Universitario La Paz                               | Madrid               |
| Manuel Párraga. Hospital General Universitario José María Morales Meseguer                | Murcia               |
| Aitor Ansotegui/Eva Regidor/Juan Angel Tihista                                            | Navarra              |
| Complejo Hospitalario de Navarra (Pamplona)                                               |                      |

---

CCAA = Autonomous Region of Spain.
